# Supplementary material
Source: PubMed Central journal article supplement (PMC8023855)

**SUPPLEMENTARY MATERIAL****Supplementary Table 1. Prevalence of underweight, normal weight, overweight and obesity of included patients according to treatment group.**

| BMI            | ABEMACICLIB + ET<br>(N = 757) |       | PLACEBO + ET<br>(N = 381) |       |
|----------------|-------------------------------|-------|---------------------------|-------|
| Mean ± SD      | 26.4 ± 5.6                    |       | 26.6 ± 5.7                |       |
| Median (Q1-Q3) | 25.5 (22.2-29.7)              |       | 25.9 (22.5-30.1)          |       |
| Underweight    | 24                            | 3.2%  | 8                         | 2.1%  |
| Normal         | 327                           | 43.2% | 164                       | 43.0% |
| Overweight     | 223                           | 29.5% | 113                       | 29.7% |
| Obese          | 183                           | 24.2% | 96                        | 25.2% |

**Supplementary Table 2. Univariate and multivariate analysis of PFS according to BMI (<25 and ≥25) in patients treated with abemaciclib + ET vs. placebo + ET.**

| BMI              | PFS rate at 1 year | Median PFS (months) | Unadjusted HR (95% CI) | P Value | Adjusted* HR (95% CI) | P Value |
|------------------|--------------------|---------------------|------------------------|---------|-----------------------|---------|
| Abemaciclib + ET |                    |                     |                        |         |                       |         |
| <25              | 67%                | 22.0 (17.2-29.1)    |                        |         |                       |         |
| ≥25              | 66%                | 21.7 (17.1-27.5)    | 1.03 (0.83-1.27)       | 0.81    | 1.0 (0.81-1.25)       | 0.98    |
| Placebo + ET     |                    |                     |                        |         |                       |         |
| <25              | 44%                | 10.8 (7.9-13.7)     |                        |         |                       |         |
| ≥ 25             | 50%                | 12.7 (9.0-15.4)     | 0.81 (0.64-1.04)       | 0.10    | 0.80 (0.62-1.04)      | 0.09    |

\*Adjusted for age, ECOG, prior endocrine therapy, prior aromatase inhibitor, menopausal status, numebr of metastatic sites and type of endocrine therapy. BMI: Body mass index, PFS: progression-free survival, HR: Hazard ratio, CI: confidence interval, ET: endocrine therapy

**Supplementary Table 3. Adverse events according to BMI (< 25 and ≥25) in patients receiving abemaciclib + ET and placebo + ET\***

| Adverse event                              | BMI <25 |       | BMI ≥25 |       | P-value |
|--------------------------------------------|---------|-------|---------|-------|---------|
| Group 1: abemaciclib + ET (N = 757), No.   | 351     |       | 406     |       |         |
| Pts with a fatal AE                        | 7       | 2.0%  | 12      | 3.0%  | 0.49    |
| Pts with treatment withdrawal for toxicity | 36      | 10.3% | 54      | 13.3% | 0.20    |
| Pts with diarrhea (any grade)              | 307     | 87.5% | 337     | 83.0% | 0.08    |
| Pts with diarrhea grade ≥3                 | 41      | 11.7% | 47      | 11.6% | 0.96    |
| Pts with neutropenia (any grade)           | 179     | 51.0% | 164     | 40.4% | 0.004   |
| Pts with neutropenia grade ≥3              | 103     | 29.3% | 88      | 21.7% | 0.02    |
| Pts with weight decrease (any grade)       | 40      | 11.4% | 45      | 11.1% | 0.89    |
| Pts with weight decrease grade ≥3          | 3       | 0.9%  | 2       | 0.5%  | 0.67    |
| Group 2: placebo ET (N = 381), No          | 172     |       | 209     |       |         |
| Pts with at least on grade ≥3              | 41      | 23.8% | 52      | 24.9% | 0.81    |
| Pts with a fatal AE                        | 1       | 0.6%  | 3       | 1.4%  | 0.63    |
| Pts with treatment withdrawal for toxicity | 4       | 2.3%  | 8       | 3.8%  | 0.56    |

\* pts: patients, AE: adverse event, ET: Endocrine therapy, BMI: body mass index

**Supplementary Table 4. Dose adjustment, reduction, omission and treatment discontinuation according to BMI in both treatment groups.\***

|                                                       | BMI < 25 |       | BMI ≥ 25 |       | P-value |
|-------------------------------------------------------|----------|-------|----------|-------|---------|
| Group 1: abemaciclib + ET (N = 757), No.              | 351      |       | 406      |       |         |
| Discontinuation of study therapy due to AE            | 36       | 10.3% | 54       | 13.3% | 0.20    |
| Discontinuation of study therapy from death due to AE | 6        | 1.7%  | 7        | 1.7%  | 1       |
| Discontinuation of any study drug due to AE           | 69       | 19.7% | 79       | 19.5% | 0.94    |
| Discontinuation of abemaciclib due to AE              | 34       | 9.7%  | 28       | 6.9%  | 0.16    |
| Dose adjust of abemaciclib due to AE                  | 214      | 61.0% | 250      | 61.6% | 0.86    |
| Dose reduction of abemaciclib due to AE               | 156      | 44.4% | 181      | 44.6% | 0.97    |
| Dose omission of abemaciclib due to AE                | 197      | 56.1% | 222      | 54.7% | 0.69    |
| Dose adjust of study drug due to AE                   | 219      | 62.4% | 253      | 62.3% | 0.98    |
| Dose reduction of study drug due to AE                | 157      | 44.7% | 181      | 44.6% | 0.97    |
| Dose omission of study drug due to AE                 | 202      | 57.6% | 225      | 55.4% | 0.56    |
| Group 2: placebo + ET (N = 381), No.                  | 172      |       | 209      |       |         |
| Discontinuation of study therapy due to AE            | 4        | 2.3%  | 8        | 3.8%  | 0.56    |
| Discontinuation of study therapy from death due to AE | -        | -     | 3        | 1.4%  | 0.26    |
| Discontinuation of any study drug due to AE           | 4        | 2.3%  | 10       | 4.8%  | 0.28    |
| Dose adjust of study drug due to AE                   | 28       | 16.3% | 30       | 14.4% | 0.60    |
| Dose reduction of study drug due to AE                | 6        | 3.5%  | 7        | 3.4%  | 1       |
| Dose omission of study drug due to AE                 | 27       | 15.7% | 30       | 14.4% | 0.71    |

\* ET: endocrine therapy, AE: adverse event, BMI: body mass index

**Supplementary Figure 1. Flowchart of patient selection and inclusion.**

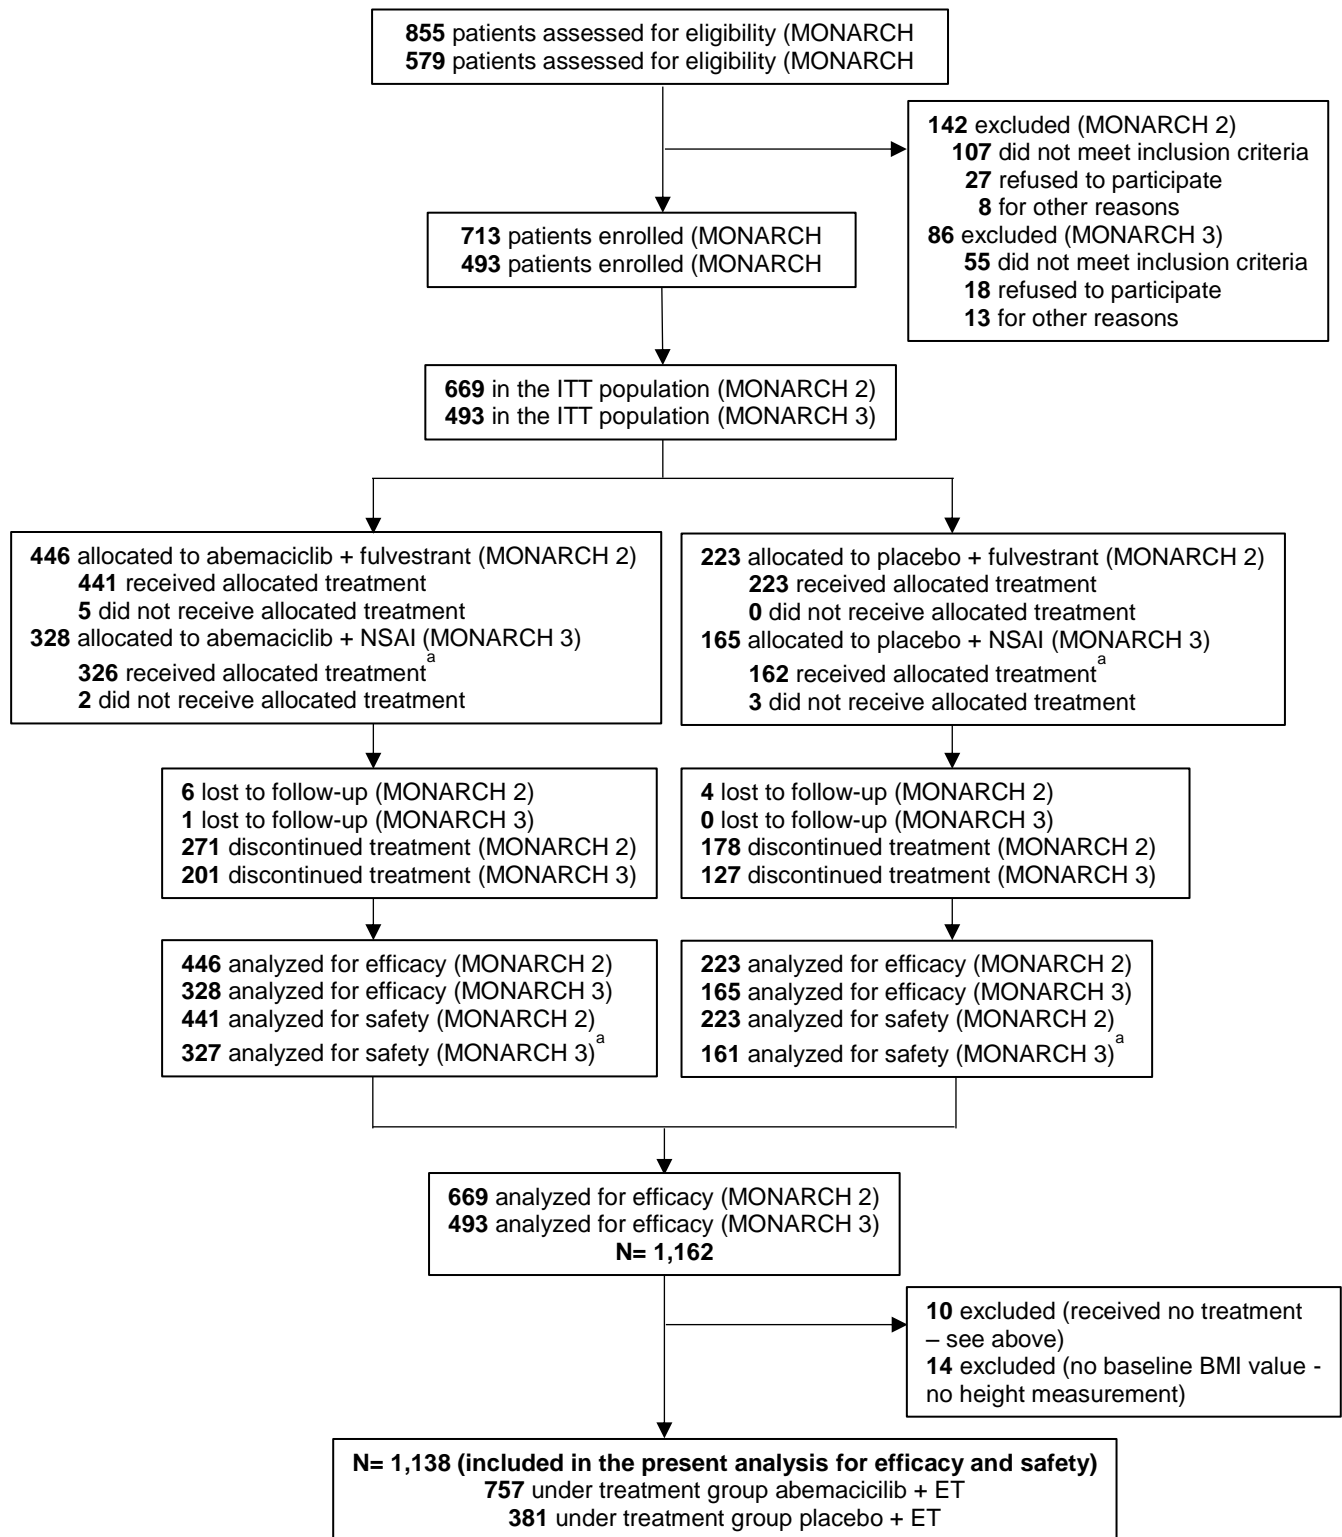

<sup>a</sup> In MONARCH 3, during Cycle 1 a single patient who was randomized to placebo received abemaciclib, and this patient is included in the abemaciclib safety population.

Legends: ITT, intent-to-treat; NSAI, nonsteroidal aromatase inhibitor, ET: endocrine therapy

**Supplementary Figure 2.** A) PFS in normal weight patients receiving abemaciclib + ET vs placebo + ET. Abemaciclib patients had a longer PFS (21.9 vs. 10.8 months), for a hazard ratio of 0.48 (95% CI, 0.38-0.61; p-value <0.001). B) PFS in overweight patients receiving abemaciclib + ET vs placebo +ET. Abemaciclib patients had a longer PFS (22.0 vs. 14.0 months), for a hazard ratio of 0.54 (95% CI, 0.40 -0.73; p value < 0.001). C) PFS in obese patients receiving abemaciclib + ET vs placebo + ET. Abemaciclib patients had a longer PFS (20.2 vs. 11.6 months), for a hazard ratio of 0.70 (95% CI, 0.50-0.97; p-value 0.03).

A

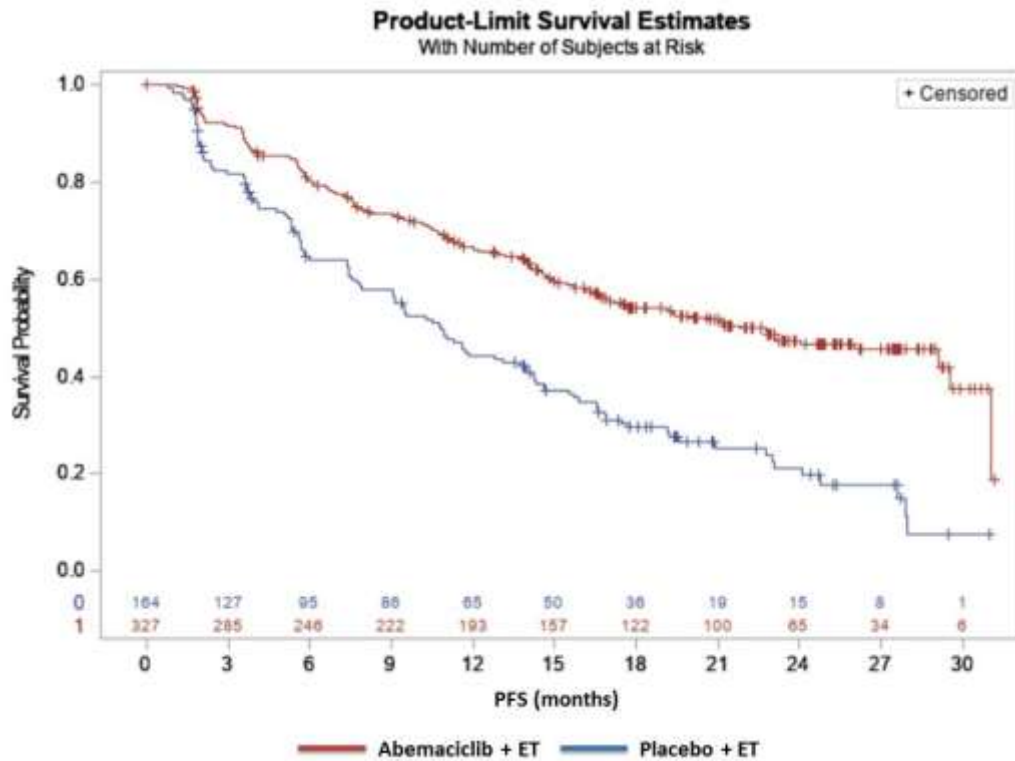

**B**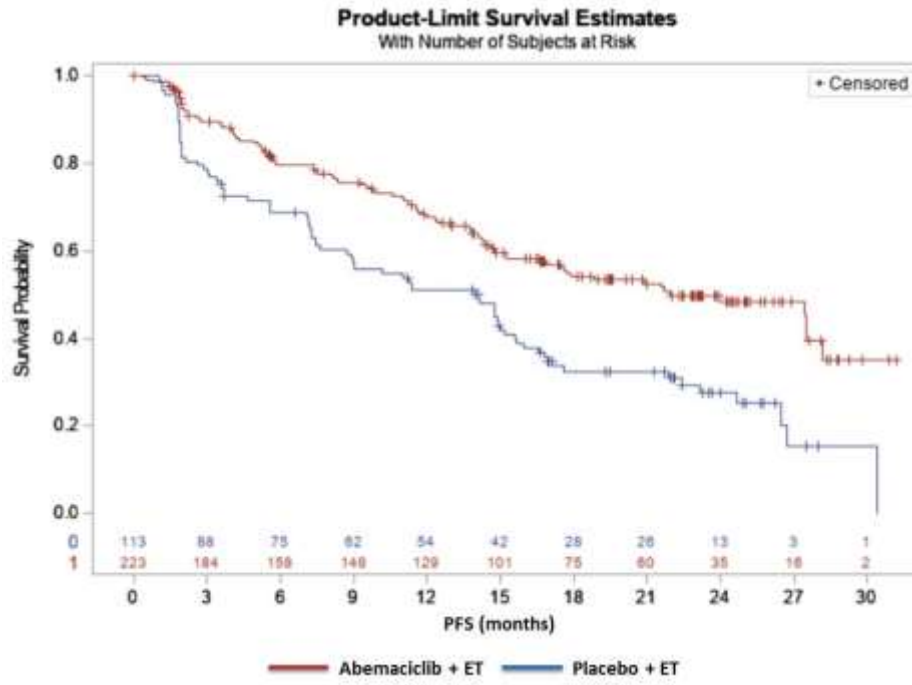**C**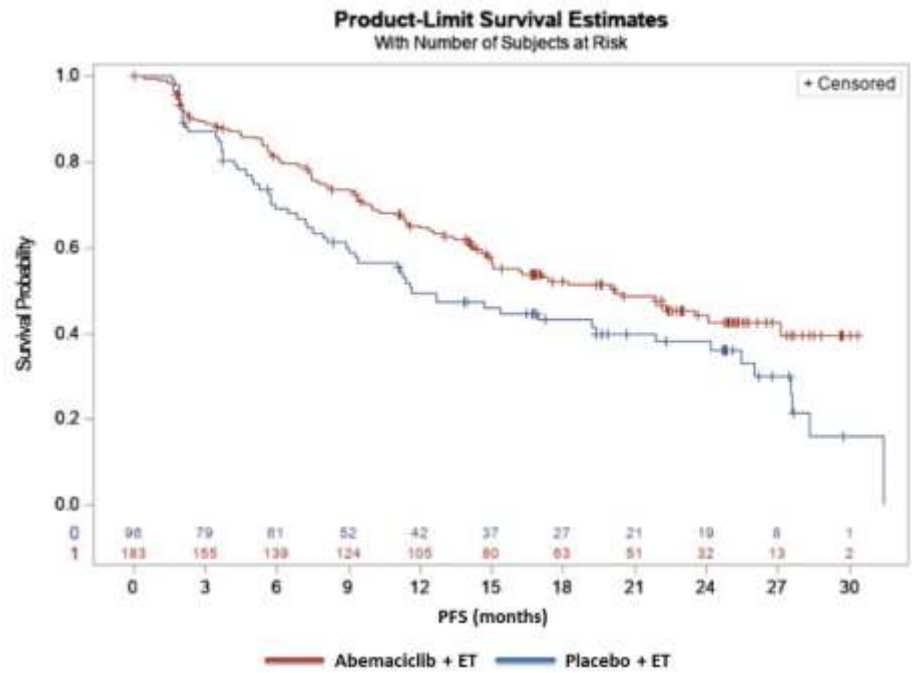

**Supplementary Figure 3. Association of weight loss and progression-free survival in patients receiving abemaciclib + ET vs placebo + ET.** In the abemaciclib arm, there was no difference in PFS between the two weight change classes:  $p=0.55$ . In the placebo arm, there was also no difference in PFS between the two weight change classes:  $p=0.95$ .

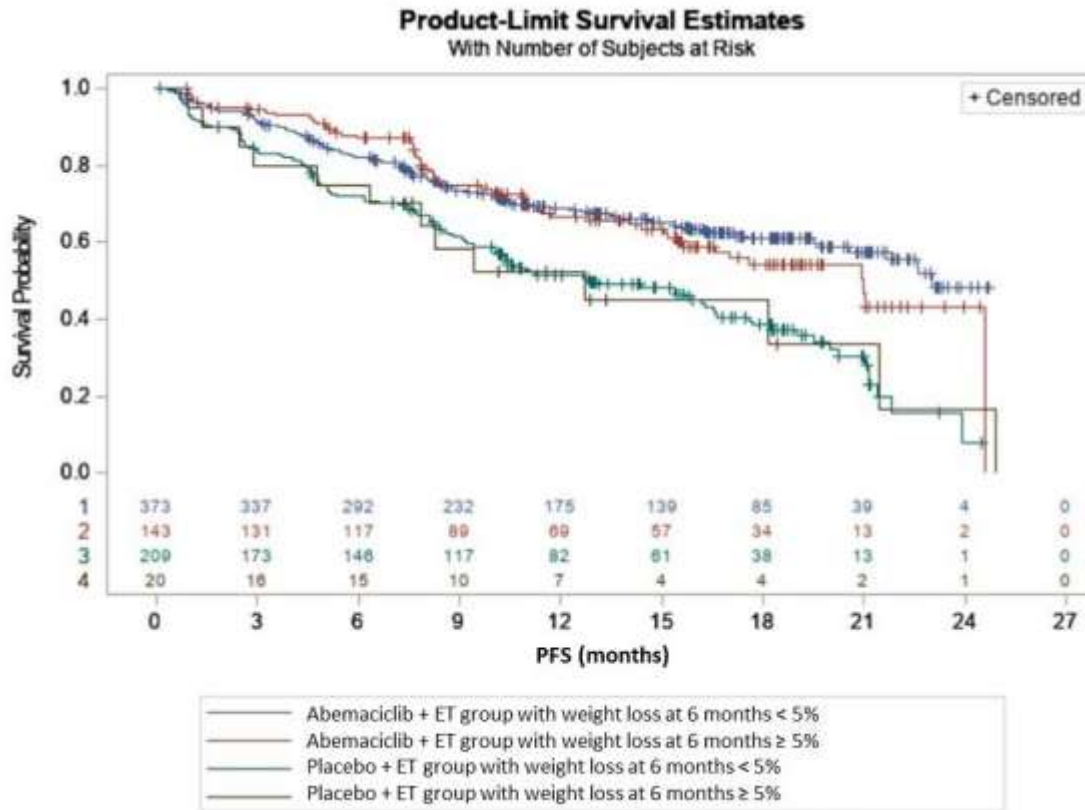

Supplement: djaa116_supplementary_data.pdf [file djaa116_supplementary_data.pdf]
